# Supplementary material for: MrMYB44-Like Negatively Regulates Anthocyanin Biosynthesis and Causes Spring Leaf Color of Malus ‘Radiant’ to Fade From Red to Green
Source: Front Plant Sci. 2022 Feb 1;13:822340. doi: 10.3389/fpls.2022.822340 (PMC8843855; doi:10.3389/fpls.2022.822340)
Supplement: Supplementary file 3 [file Table_3.xlsx]

## Sheet: Anthocyanin Biosynthesis
Table S3 Differentially expressed anthocyanin biosynthesis genes in S1 vs. S4 library
id	S1_mean	S4_mean	log2(fc)	PValue	FDR	Description	KEGG_A_class	KEGG_B_class	Pathway	K_ID	GO Component	GO Function	GO Process
HF01560	310.353	4.97333	-5.96355	6.38369e-33	6.20722e-31	PREDICTED: phenylalanine ammonia-lyase 1-like [Malus domestica]	Metabolism;Metabolism;Metabolism;Metabolism	Global and overview maps;Global and overview maps;Biosynthesis of other secondary metabolites;Amino acid metabolism	ko01100//Metabolic pathways;ko01110//Biosynthesis of secondary metabolites;ko00940//Phenylpropanoid biosynthesis;ko00360//Phenylalanine metabolism	K10775;K10775;K10775;K10775	GO:0005737//cytoplasm	GO:0003824//catalytic activity;GO:0016841//ammonia-lyase activity	GO:0006559//L-phenylalanine catabolic process
HF04849	152.807	7.13333	-4.42099	6.31419e-24	3.26724e-22	PREDICTED: phenylalanine ammonia-lyase 1 [Malus domestica]	Metabolism;Metabolism;Metabolism;Metabolism	Global and overview maps;Global and overview maps;Biosynthesis of other secondary metabolites;Amino acid metabolism	ko01100//Metabolic pathways;ko01110//Biosynthesis of secondary metabolites;ko00940//Phenylpropanoid biosynthesis;ko00360//Phenylalanine metabolism	K10775;K10775;K10775;K10775	GO:0005737//cytoplasm	GO:0003824//catalytic activity;GO:0016841//ammonia-lyase activity	GO:0006559//L-phenylalanine catabolic process
HF23281	138.927	10.3533	-3.74616	1.45045e-22	6.68808e-21	PREDICTED: 4-coumarate--CoA ligase 2-like [Malus domestica]	Metabolism;Metabolism;Metabolism;Metabolism;Metabolism	Global and overview maps;Global and overview maps;Biosynthesis of other secondary metabolites;Amino acid metabolism;Metabolism of cofactors and vitamins	ko01100//Metabolic pathways;ko01110//Biosynthesis of secondary metabolites;ko00940//Phenylpropanoid biosynthesis;ko00360//Phenylalanine metabolism;ko00130//Ubiquinone and other terpenoid-quinone biosynthesis	K01904;K01904;K01904;K01904;K01904	-	GO:0003824//catalytic activity	-
HF32455	32.6433	87.3933	1.42073	2.75378e-19	9.25161e-18	p-coumarate:CoA ligase 1 [Sorbus aucuparia]	Metabolism;Metabolism;Metabolism;Metabolism;Metabolism	Global and overview maps;Global and overview maps;Biosynthesis of other secondary metabolites;Amino acid metabolism;Metabolism of cofactors and vitamins	ko01100//Metabolic pathways;ko01110//Biosynthesis of secondary metabolites;ko00940//Phenylpropanoid biosynthesis;ko00360//Phenylalanine metabolism;ko00130//Ubiquinone and other terpenoid-quinone biosynthesis	K01904;K01904;K01904;K01904;K01904	-	GO:0003824//catalytic activity	-
HF43556	336.9	126.827	-1.40946	1.3491e-06	8.15411e-06	trans-cinnamate 4-monooxygenase [Malus domestica]	Metabolism;Metabolism;Metabolism;Metabolism;Metabolism;Metabolism;Metabolism	Global and overview maps;Global and overview maps;Biosynthesis of other secondary metabolites;Biosynthesis of other secondary metabolites;Amino acid metabolism;Metabolism of cofactors and vitamins;Biosynthesis of other secondary metabolites	ko01100//Metabolic pathways;ko01110//Biosynthesis of secondary metabolites;ko00940//Phenylpropanoid biosynthesis;ko00941//Flavonoid biosynthesis;ko00360//Phenylalanine metabolism;ko00130//Ubiquinone and other terpenoid-quinone biosynthesis;ko00945//Stilbenoid, diarylheptanoid and gingerol biosynthesis	K00487;K00487;K00487;K00487;K00487;K00487;K00487	-	GO:0005506//iron ion binding;GO:0016705//oxidoreductase activity, acting on paired donors, with incorporation or reduction of molecular oxygen;GO:0020037//heme binding	GO:0055114//oxidation-reduction process
HF39983	174.533	75.1267	-1.21611	8.58672e-07	5.41571e-06	PREDICTED: trans-cinnamate 4-monooxygenase [Pyrus x bretschneideri]	Metabolism;Metabolism;Metabolism;Metabolism;Metabolism;Metabolism;Metabolism	Global and overview maps;Global and overview maps;Biosynthesis of other secondary metabolites;Biosynthesis of other secondary metabolites;Amino acid metabolism;Metabolism of cofactors and vitamins;Biosynthesis of other secondary metabolites	ko01100//Metabolic pathways;ko01110//Biosynthesis of secondary metabolites;ko00940//Phenylpropanoid biosynthesis;ko00941//Flavonoid biosynthesis;ko00360//Phenylalanine metabolism;ko00130//Ubiquinone and other terpenoid-quinone biosynthesis;ko00945//Stilbenoid, diarylheptanoid and gingerol biosynthesis	K00487;K00487;K00487;K00487;K00487;K00487;K00487	-	GO:0005506//iron ion binding;GO:0016705//oxidoreductase activity, acting on paired donors, with incorporation or reduction of molecular oxygen;GO:0020037//heme binding	GO:0055114//oxidation-reduction process
HF00721	1147.31	29.13	-5.2996	2.13212e-07	1.50851e-06	polyketide synthase 5 [Malus domestica]	Metabolism;Metabolism;Metabolism;Organismal Systems	Global and overview maps;Global and overview maps;Biosynthesis of other secondary metabolites;Environmental adaptation	ko01100//Metabolic pathways;ko01110//Biosynthesis of secondary metabolites;ko00941//Flavonoid biosynthesis;ko04712//Circadian rhythm - plant	K00660;K00660;K00660;K00660	-	GO:0003824//catalytic activity;GO:0016746//transferase activity, transferring acyl groups;GO:0016747//transferase activity, transferring acyl groups other than amino-acyl groups	GO:0009058//biosynthetic process
HF35684	721.92	32.5633	-4.47052	6.29896e-08	4.87923e-07	chalcone synthase [Malus domestica]	Metabolism;Metabolism;Metabolism;Organismal Systems	Global and overview maps;Global and overview maps;Biosynthesis of other secondary metabolites;Environmental adaptation	ko01100//Metabolic pathways;ko01110//Biosynthesis of secondary metabolites;ko00941//Flavonoid biosynthesis;ko04712//Circadian rhythm - plant	K00660;K00660;K00660;K00660	-	GO:0003824//catalytic activity;GO:0016746//transferase activity, transferring acyl groups;GO:0016747//transferase activity, transferring acyl groups other than amino-acyl groups	GO:0009058//biosynthetic process
HF00720	2211.14	140.977	-3.97126	7.54788e-06	3.98963e-05	polyketide synthase 5 [Malus domestica]	Metabolism;Metabolism;Metabolism;Organismal Systems	Global and overview maps;Global and overview maps;Biosynthesis of other secondary metabolites;Environmental adaptation	ko01100//Metabolic pathways;ko01110//Biosynthesis of secondary metabolites;ko00941//Flavonoid biosynthesis;ko04712//Circadian rhythm - plant	K00660;K00660;K00660;K00660	-	GO:0003824//catalytic activity;GO:0016746//transferase activity, transferring acyl groups;GO:0016747//transferase activity, transferring acyl groups other than amino-acyl groups	GO:0009058//biosynthetic process
HF00723	95.43	17.5333	-2.44434	9.67722e-11	1.14466e-09	PREDICTED: uncharacterized protein LOC103443510 [Malus domestica]	Metabolism;Metabolism;Metabolism;Organismal Systems	Global and overview maps;Global and overview maps;Biosynthesis of other secondary metabolites;Environmental adaptation	ko01100//Metabolic pathways;ko01110//Biosynthesis of secondary metabolites;ko00941//Flavonoid biosynthesis;ko04712//Circadian rhythm - plant	K00660;K00660;K00660;K00660	-	GO:0003824//catalytic activity;GO:0016746//transferase activity, transferring acyl groups;GO:0016747//transferase activity, transferring acyl groups other than amino-acyl groups	GO:0009058//biosynthetic process
HF25490	130.37	9.02	-3.85334	3.81569e-17	1.0091e-15	PREDICTED: probable chalcone--flavonone isomerase 3 isoform X1 [Malus domestica]	Metabolism;Metabolism;Metabolism	Global and overview maps;Global and overview maps;Biosynthesis of other secondary metabolites	ko01100//Metabolic pathways;ko01110//Biosynthesis of secondary metabolites;ko00941//Flavonoid biosynthesis	K01859;K01859;K01859	-	GO:0016872//intramolecular lyase activity	-
HF23861	581.02	45.1367	-3.68622	2.97765e-05	0.000139621	PREDICTED: probable chalcone--flavonone isomerase 3 isoform X2 [Malus domestica]	Metabolism;Metabolism;Metabolism	Global and overview maps;Global and overview maps;Biosynthesis of other secondary metabolites	ko01100//Metabolic pathways;ko01110//Biosynthesis of secondary metabolites;ko00941//Flavonoid biosynthesis	K01859;K01859;K01859	-	GO:0016872//intramolecular lyase activity	-
HF25114	181.623	37.0267	-2.29431	0.0214715	0.0491474	PREDICTED: chalcone--flavonone isomerase-like [Malus domestica]	Metabolism;Metabolism;Metabolism	Global and overview maps;Global and overview maps;Biosynthesis of other secondary metabolites	ko01100//Metabolic pathways;ko01110//Biosynthesis of secondary metabolites;ko00941//Flavonoid biosynthesis	K01859;K01859;K01859	-	GO:0016872//intramolecular lyase activity	-
HF19324	242.187	24.93	-3.28016	7.06932e-17	1.81585e-15	flavanon 3 beta-hydroxylase [Malus domestica]	Metabolism;Metabolism;Metabolism	Global and overview maps;Global and overview maps;Biosynthesis of other secondary metabolites	ko01100//Metabolic pathways;ko01110//Biosynthesis of secondary metabolites;ko00941//Flavonoid biosynthesis	K00475;K00475;K00475	-	GO:0016491//oxidoreductase activity	GO:0055114//oxidation-reduction process
HF31029	196.817	34.4167	-2.51567	3.06911e-29	2.33521e-27	naringenin,2-oxoglutarate 3-dioxygenase-like [Malus domestica]	Metabolism;Metabolism;Metabolism	Global and overview maps;Global and overview maps;Biosynthesis of other secondary metabolites	ko01100//Metabolic pathways;ko01110//Biosynthesis of secondary metabolites;ko00941//Flavonoid biosynthesis	K00475;K00475;K00475	-	GO:0016491//oxidoreductase activity	GO:0055114//oxidation-reduction process
HF24768	95.28	6.36667	-3.90356	5.07724e-07	3.34927e-06	flavonoid 3' hydroxylase [Malus domestica]	Metabolism;Metabolism;Metabolism;Metabolism	Global and overview maps;Global and overview maps;Biosynthesis of other secondary metabolites;Biosynthesis of other secondary metabolites	ko01100//Metabolic pathways;ko01110//Biosynthesis of secondary metabolites;ko00941//Flavonoid biosynthesis;ko00944//Flavone and flavonol biosynthesis	K05280;K05280;K05280;K05280	-	GO:0005506//iron ion binding;GO:0016705//oxidoreductase activity, acting on paired donors, with incorporation or reduction of molecular oxygen;GO:0020037//heme binding	GO:0055114//oxidation-reduction process
HF13503	194.033	29.8367	-2.70115	1.36985e-07	1.00361e-06	bifunctional dihydroflavonol 4-reductase/flavanone 4-reductase [Malus domestica]	Metabolism;Metabolism;Metabolism	Global and overview maps;Global and overview maps;Biosynthesis of other secondary metabolites	ko01100//Metabolic pathways;ko01110//Biosynthesis of secondary metabolites;ko00941//Flavonoid biosynthesis	K13082;K13082;K13082	-	GO:0003824//catalytic activity;GO:0050662//coenzyme binding	-
MSTRG.29757	18	1.90333	-3.2414	8.67662e-43	1.50138e-40	glycosyltransferase UGT88A1 [Malus pumila]	Metabolism;Metabolism	Global and overview maps;Biosynthesis of other secondary metabolites	ko01110//Biosynthesis of secondary metabolites;ko00941//Flavonoid biosynthesis	K22845;K22845	-	-	-
HF25901	257.53	34.07	-2.91817	2.40831e-65	9.81158e-63	PREDICTED: UDP-glycosyltransferase 88A1-like [Malus domestica]	Metabolism;Metabolism	Global and overview maps;Biosynthesis of other secondary metabolites	ko01110//Biosynthesis of secondary metabolites;ko00941//Flavonoid biosynthesis	K22845;K22845	-	GO:0016758//transferase activity, transferring hexosyl groups	-
HF25899	12.5267	51.8767	2.05008	3.12377e-11	3.93651e-10	PREDICTED: UDP-glycosyltransferase 88A1-like [Malus domestica]	Metabolism;Metabolism	Global and overview maps;Biosynthesis of other secondary metabolites	ko01110//Biosynthesis of secondary metabolites;ko00941//Flavonoid biosynthesis	K22845;K22845	-	GO:0016758//transferase activity, transferring hexosyl groups	-
HF08300	803.597	65.8967	-3.60819	4.11853e-05	0.000187516	PREDICTED: leucoanthocyanidin dioxygenase [Malus domestica]	Metabolism;Metabolism;Metabolism	Global and overview maps;Global and overview maps;Biosynthesis of other secondary metabolites	ko01100//Metabolic pathways;ko01110//Biosynthesis of secondary metabolites;ko00941//Flavonoid biosynthesis	K05277;K05277;K05277	-	GO:0016491//oxidoreductase activity	GO:0055114//oxidation-reduction process
HF39612	312.597	41.8033	-2.90261	2.19979e-08	1.8428e-07	anthocyanidin synthase protein [Malus hybrid cultivar]	Metabolism;Metabolism;Metabolism	Global and overview maps;Global and overview maps;Biosynthesis of other secondary metabolites	ko01100//Metabolic pathways;ko01110//Biosynthesis of secondary metabolites;ko00941//Flavonoid biosynthesis	K05277;K05277;K05277	-	GO:0016491//oxidoreductase activity	GO:0055114//oxidation-reduction process

## Sheet: Anthocyanin Degradation
Table S3 Differentially expressed anthocyanin degradation genes in S1 vs. S4 library
id	S1_mean	S4_mean	log2(fc)	PValue	FDR	Description	KEGG_A_class	KEGG_B_class	Pathway	K_ID	GO Component	GO Function	GO Process
HF37642	0.636667	59.62	6.54911	1.31684e-105	2.35458e-102	PREDICTED: laccase-4-like [Malus domestica]	-	-	-	-	GO:0048046//apoplast	GO:0005507//copper ion binding;GO:0005507//copper ion binding;GO:0016491//oxidoreductase activity;GO:0052716//hydroquinone:oxygen oxidoreductase activity	GO:0046274//lignin catabolic process;GO:0055114//oxidation-reduction process
HF23917	0.47	34.9567	6.21676	2.25695e-23	1.1107e-21	PREDICTED: laccase-12-like [Malus domestica]	-	-	-	-	GO:0048046//apoplast	GO:0005507//copper ion binding;GO:0005507//copper ion binding;GO:0016491//oxidoreductase activity;GO:0052716//hydroquinone:oxygen oxidoreductase activity	GO:0046274//lignin catabolic process;GO:0055114//oxidation-reduction process
HF44176	4.56	0.03	-7.24793	2.56783e-22	1.16402e-20	PREDICTED: laccase-11-like [Malus domestica]	-	-	-	-	GO:0048046//apoplast	GO:0005507//copper ion binding;GO:0005507//copper ion binding;GO:0016491//oxidoreductase activity;GO:0052716//hydroquinone:oxygen oxidoreductase activity	GO:0046274//lignin catabolic process;GO:0055114//oxidation-reduction process
HF06309	6.6	0.0866667	-6.25084	1.68606e-19	5.79145e-18	PREDICTED: laccase-17-like [Malus domestica]	-	-	-	-	GO:0048046//apoplast	GO:0005507//copper ion binding;GO:0005507//copper ion binding;GO:0016491//oxidoreductase activity;GO:0052716//hydroquinone:oxygen oxidoreductase activity	GO:0046274//lignin catabolic process;GO:0055114//oxidation-reduction process
HF27892	1.48667	15.1967	3.3536	9.10839e-17	2.31376e-15	PREDICTED: laccase-17-like [Malus domestica]	-	-	-	-	GO:0048046//apoplast	GO:0005507//copper ion binding;GO:0005507//copper ion binding;GO:0016491//oxidoreductase activity;GO:0052716//hydroquinone:oxygen oxidoreductase activity	GO:0046274//lignin catabolic process;GO:0055114//oxidation-reduction process
HF25449	0.183333	23.1467	6.98019	1.38173e-13	2.34799e-12	Laccase-5 [Capsicum chinense]	-	-	-	-	GO:0048046//apoplast	GO:0005507//copper ion binding;GO:0005507//copper ion binding;GO:0016491//oxidoreductase activity;GO:0052716//hydroquinone:oxygen oxidoreductase activity	GO:0046274//lignin catabolic process;GO:0055114//oxidation-reduction process
HF27636	3.46	0.001	-11.7566	2.93715e-13	4.8157e-12	PREDICTED: laccase-11-like isoform X1 [Malus domestica]	-	-	-	-	GO:0048046//apoplast	GO:0005507//copper ion binding;GO:0005507//copper ion binding;GO:0016491//oxidoreductase activity;GO:0052716//hydroquinone:oxygen oxidoreductase activity	GO:0046274//lignin catabolic process;GO:0055114//oxidation-reduction process
HF27740	11.09	121.037	3.44811	1.26469e-10	1.47052e-09	PREDICTED: laccase-4-like [Malus domestica]	-	-	-	-	GO:0048046//apoplast	GO:0005507//copper ion binding;GO:0005507//copper ion binding;GO:0016491//oxidoreductase activity;GO:0052716//hydroquinone:oxygen oxidoreductase activity	GO:0046274//lignin catabolic process;GO:0055114//oxidation-reduction process
HF27889	0.44	8.7	4.30544	2.28177e-10	2.56779e-09	PREDICTED: laccase-17-like [Pyrus x bretschneideri]	-	-	-	-	GO:0048046//apoplast	GO:0005507//copper ion binding;GO:0005507//copper ion binding;GO:0016491//oxidoreductase activity;GO:0052716//hydroquinone:oxygen oxidoreductase activity	GO:0046274//lignin catabolic process;GO:0055114//oxidation-reduction process
HF23919	0.0333333	7.16667	7.74819	1.40511e-09	1.41367e-08	PREDICTED: laccase-12-like [Malus domestica]	-	-	-	-	GO:0048046//apoplast	GO:0005507//copper ion binding;GO:0005507//copper ion binding;GO:0016491//oxidoreductase activity;GO:0052716//hydroquinone:oxygen oxidoreductase activity	GO:0046274//lignin catabolic process;GO:0055114//oxidation-reduction process
HF22415	4.63667	0.54	-3.10206	2.07511e-09	2.03931e-08	PREDICTED: laccase-11-like [Malus domestica]	-	-	-	-	GO:0048046//apoplast	GO:0005507//copper ion binding;GO:0005507//copper ion binding;GO:0016491//oxidoreductase activity;GO:0052716//hydroquinone:oxygen oxidoreductase activity	GO:0046274//lignin catabolic process;GO:0055114//oxidation-reduction process
HF31140	12.91	1.67	-2.95057	9.77233e-09	8.68847e-08	PREDICTED: laccase-11-like [Malus domestica]	-	-	-	-	GO:0048046//apoplast	GO:0005507//copper ion binding;GO:0005507//copper ion binding;GO:0016491//oxidoreductase activity;GO:0052716//hydroquinone:oxygen oxidoreductase activity	GO:0046274//lignin catabolic process;GO:0055114//oxidation-reduction process
HF06310	9.22	0.166667	-5.78973	4.5288e-05	0.000204231	PREDICTED: laccase-17-like [Malus domestica]	-	-	-	-	GO:0048046//apoplast	GO:0005507//copper ion binding;GO:0005507//copper ion binding;GO:0016491//oxidoreductase activity;GO:0052716//hydroquinone:oxygen oxidoreductase activity	GO:0046274//lignin catabolic process;GO:0055114//oxidation-reduction process
MSTRG.1973	0.446667	3.60667	3.0134	0.000100334	0.00041971	PREDICTED: laccase-15-like [Malus domestica]	-	-	-	-	GO:0005576//extracellular region	GO:0016682//oxidoreductase activity, acting on diphenols and related substances as donors, oxygen as acceptor;GO:0043169//cation binding	GO:0009808//lignin metabolic process
HF25317	0.276667	10.1067	5.19101	0.000188471	0.00074056	PREDICTED: laccase-4-like [Malus domestica]	-	-	-	-	GO:0048046//apoplast	GO:0005507//copper ion binding;GO:0005507//copper ion binding;GO:0016491//oxidoreductase activity;GO:0052716//hydroquinone:oxygen oxidoreductase activity	GO:0046274//lignin catabolic process;GO:0055114//oxidation-reduction process
HF31136	5.89667	0.0633333	-6.54079	0.000463749	0.00165805	PREDICTED: laccase-11-like [Malus domestica]	-	-	-	-	GO:0048046//apoplast	GO:0005507//copper ion binding;GO:0005507//copper ion binding;GO:0016491//oxidoreductase activity;GO:0052716//hydroquinone:oxygen oxidoreductase activity	GO:0046274//lignin catabolic process;GO:0055114//oxidation-reduction process
HF23288	5.14667	15.3567	1.57715	0.0026853	0.00792189	PREDICTED: laccase-15-like [Malus domestica]	-	-	-	-	GO:0048046//apoplast	GO:0005507//copper ion binding;GO:0005507//copper ion binding;GO:0016491//oxidoreductase activity;GO:0052716//hydroquinone:oxygen oxidoreductase activity	GO:0046274//lignin catabolic process;GO:0055114//oxidation-reduction process
HF04612	14.0833	4.36333	-1.69049	0.00515398	0.014084	PREDICTED: laccase-17-like [Malus domestica]	-	-	-	-	GO:0048046//apoplast	GO:0005507//copper ion binding;GO:0005507//copper ion binding;GO:0016491//oxidoreductase activity;GO:0052716//hydroquinone:oxygen oxidoreductase activity	GO:0046274//lignin catabolic process;GO:0055114//oxidation-reduction process
HF21285	32.4133	1.63	-4.31364	2.61204e-45	5.00407e-43	PREDICTED: peroxidase 18 [Malus domestica]	Metabolism;Metabolism;Metabolism	Global and overview maps;Global and overview maps;Biosynthesis of other secondary metabolites	ko01100//Metabolic pathways;ko01110//Biosynthesis of secondary metabolites;ko00940//Phenylpropanoid biosynthesis	K00430;K00430;K00430	-	GO:0004601//peroxidase activity;GO:0020037//heme binding	GO:0006979//response to oxidative stress;GO:0055114//oxidation-reduction process
HF39736	0.001	64.4533	15.976	1.28623e-28	9.38712e-27	PREDICTED: peroxidase A2-like [Pyrus x bretschneideri]	Metabolism;Metabolism;Metabolism	Global and overview maps;Global and overview maps;Biosynthesis of other secondary metabolites	ko01100//Metabolic pathways;ko01110//Biosynthesis of secondary metabolites;ko00940//Phenylpropanoid biosynthesis	K00430;K00430;K00430	-	GO:0004601//peroxidase activity;GO:0020037//heme binding	GO:0006979//response to oxidative stress;GO:0055114//oxidation-reduction process
HF39739	0.001	13.2767	13.6966	7.61998e-23	3.59602e-21	Plant peroxidase [Macleaya cordata]	Metabolism;Metabolism;Metabolism	Global and overview maps;Global and overview maps;Biosynthesis of other secondary metabolites	ko01100//Metabolic pathways;ko01110//Biosynthesis of secondary metabolites;ko00940//Phenylpropanoid biosynthesis	K00430;K00430;K00430	-	GO:0004601//peroxidase activity;GO:0020037//heme binding	GO:0006979//response to oxidative stress;GO:0055114//oxidation-reduction process
HF23902	7.26	63.0533	3.11853	7.56162e-17	1.93151e-15	peroxidase 4 [Quercus suber]	Metabolism;Metabolism;Metabolism	Global and overview maps;Global and overview maps;Biosynthesis of other secondary metabolites	ko01100//Metabolic pathways;ko01110//Biosynthesis of secondary metabolites;ko00940//Phenylpropanoid biosynthesis	K00430;K00430;K00430	-	GO:0004601//peroxidase activity;GO:0020037//heme binding	GO:0006979//response to oxidative stress;GO:0055114//oxidation-reduction process
HF03326	1.53667	8.66	2.49456	2.20693e-09	2.16093e-08	PREDICTED: peroxidase 47 [Malus domestica]	Metabolism;Metabolism;Metabolism	Global and overview maps;Global and overview maps;Biosynthesis of other secondary metabolites	ko01100//Metabolic pathways;ko01110//Biosynthesis of secondary metabolites;ko00940//Phenylpropanoid biosynthesis	K00430;K00430;K00430	-	GO:0004601//peroxidase activity;GO:0020037//heme binding	GO:0006979//response to oxidative stress;GO:0055114//oxidation-reduction process
HF26468	5.11667	0.83	-2.62402	1.07394e-08	9.49584e-08	PREDICTED: peroxidase 29-like [Malus domestica]	Metabolism;Metabolism;Metabolism	Global and overview maps;Global and overview maps;Biosynthesis of other secondary metabolites	ko01100//Metabolic pathways;ko01110//Biosynthesis of secondary metabolites;ko00940//Phenylpropanoid biosynthesis	K00430;K00430;K00430	-	GO:0004601//peroxidase activity;GO:0020037//heme binding	GO:0006979//response to oxidative stress;GO:0055114//oxidation-reduction process
HF12821	2.21333	0.01	-7.79008	1.60439e-08	1.37957e-07	PREDICTED: peroxidase 16-like [Malus domestica]	Metabolism;Metabolism;Metabolism	Global and overview maps;Global and overview maps;Biosynthesis of other secondary metabolites	ko01100//Metabolic pathways;ko01110//Biosynthesis of secondary metabolites;ko00940//Phenylpropanoid biosynthesis	K00430;K00430;K00430	-	GO:0004601//peroxidase activity;GO:0020037//heme binding	GO:0006979//response to oxidative stress;GO:0055114//oxidation-reduction process
HF23900	1.31	0.09	-3.8635	1.97147e-08	1.66496e-07	PREDICTED: peroxidase P7-like [Malus domestica]	Metabolism;Metabolism;Metabolism	Global and overview maps;Global and overview maps;Biosynthesis of other secondary metabolites	ko01100//Metabolic pathways;ko01110//Biosynthesis of secondary metabolites;ko00940//Phenylpropanoid biosynthesis	K00430;K00430;K00430	-	GO:0004601//peroxidase activity;GO:0020037//heme binding	GO:0006979//response to oxidative stress;GO:0055114//oxidation-reduction process
HF35330	1.51667	0.09	-4.07484	2.17292e-08	1.82219e-07	PREDICTED: peroxidase 17-like [Malus domestica]	Metabolism;Metabolism;Metabolism	Global and overview maps;Global and overview maps;Biosynthesis of other secondary metabolites	ko01100//Metabolic pathways;ko01110//Biosynthesis of secondary metabolites;ko00940//Phenylpropanoid biosynthesis	K00430;K00430;K00430	-	GO:0004601//peroxidase activity;GO:0020037//heme binding	GO:0006979//response to oxidative stress;GO:0055114//oxidation-reduction process
MSTRG.2964	0.0366667	29.2767	9.64107	4.23143e-08	3.36434e-07	PREDICTED: peroxidase 72-like [Malus domestica]	Metabolism;Metabolism;Metabolism	Global and overview maps;Global and overview maps;Biosynthesis of other secondary metabolites	ko01100//Metabolic pathways;ko01110//Biosynthesis of secondary metabolites;ko00940//Phenylpropanoid biosynthesis	K00430;K00430;K00430	-	-	-
HF38793	23.7367	6.98333	-1.76513	2.3433e-07	1.64886e-06	PREDICTED: peroxidase 63-like [Malus domestica]	Metabolism;Metabolism;Metabolism	Global and overview maps;Global and overview maps;Biosynthesis of other secondary metabolites	ko01100//Metabolic pathways;ko01110//Biosynthesis of secondary metabolites;ko00940//Phenylpropanoid biosynthesis	K00430;K00430;K00430	-	GO:0004601//peroxidase activity;GO:0020037//heme binding	GO:0006979//response to oxidative stress;GO:0055114//oxidation-reduction process
HF29423	4.87	44.29	3.18499	4.58995e-07	3.05033e-06	PREDICTED: peroxidase 3-like [Malus domestica]	Metabolism;Metabolism;Metabolism	Global and overview maps;Global and overview maps;Biosynthesis of other secondary metabolites	ko01100//Metabolic pathways;ko01110//Biosynthesis of secondary metabolites;ko00940//Phenylpropanoid biosynthesis	K00430;K00430;K00430	-	GO:0004601//peroxidase activity;GO:0020037//heme binding	GO:0006979//response to oxidative stress;GO:0055114//oxidation-reduction process
HF01608	1.74667	0.263333	-2.72964	8.64918e-07	5.45083e-06	PREDICTED: peroxidase 21 [Malus domestica]	Metabolism;Metabolism;Metabolism	Global and overview maps;Global and overview maps;Biosynthesis of other secondary metabolites	ko01100//Metabolic pathways;ko01110//Biosynthesis of secondary metabolites;ko00940//Phenylpropanoid biosynthesis	K00430;K00430;K00430	-	GO:0004601//peroxidase activity;GO:0020037//heme binding	GO:0006979//response to oxidative stress;GO:0055114//oxidation-reduction process
HF40058	15.1433	64.7	2.09508	1.06849e-06	6.60061e-06	PREDICTED: peroxidase 4-like [Malus domestica]	Metabolism;Metabolism;Metabolism	Global and overview maps;Global and overview maps;Biosynthesis of other secondary metabolites	ko01100//Metabolic pathways;ko01110//Biosynthesis of secondary metabolites;ko00940//Phenylpropanoid biosynthesis	K00430;K00430;K00430	-	GO:0004601//peroxidase activity;GO:0020037//heme binding	GO:0006979//response to oxidative stress;GO:0055114//oxidation-reduction process
HF32180	1.84	0.0433333	-5.40808	5.04418e-05	0.000225325	PREDICTED: peroxidase P7-like [Malus domestica]	Metabolism;Metabolism;Metabolism	Global and overview maps;Global and overview maps;Biosynthesis of other secondary metabolites	ko01100//Metabolic pathways;ko01110//Biosynthesis of secondary metabolites;ko00940//Phenylpropanoid biosynthesis	K00430;K00430;K00430	-	GO:0004601//peroxidase activity;GO:0020037//heme binding	GO:0006979//response to oxidative stress;GO:0055114//oxidation-reduction process
HF11989	1.86667	0.2	-3.22239	6.26189e-05	0.000273014	PREDICTED: peroxidase 19 [Malus domestica]	Metabolism;Metabolism;Metabolism	Global and overview maps;Global and overview maps;Biosynthesis of other secondary metabolites	ko01100//Metabolic pathways;ko01110//Biosynthesis of secondary metabolites;ko00940//Phenylpropanoid biosynthesis	K00430;K00430;K00430	-	GO:0004601//peroxidase activity;GO:0020037//heme binding	GO:0006979//response to oxidative stress;GO:0055114//oxidation-reduction process
HF25468	1.29667	0.373333	-1.79627	0.00760725	0.0198395	PREDICTED: peroxidase 4-like [Malus domestica]	Metabolism;Metabolism;Metabolism	Global and overview maps;Global and overview maps;Biosynthesis of other secondary metabolites	ko01100//Metabolic pathways;ko01110//Biosynthesis of secondary metabolites;ko00940//Phenylpropanoid biosynthesis	K00430;K00430;K00430	-	GO:0004601//peroxidase activity;GO:0020037//heme binding	GO:0006979//response to oxidative stress;GO:0055114//oxidation-reduction process
HF40356	18.3067	0.05	-8.51623	6.83879e-39	9.52841e-37	PREDICTED: beta-glucosidase 12-like [Malus domestica]	Metabolism;Metabolism;Metabolism;Metabolism;Metabolism	Global and overview maps;Global and overview maps;Biosynthesis of other secondary metabolites;Carbohydrate metabolism;Metabolism of other amino acids	ko01100//Metabolic pathways;ko01110//Biosynthesis of secondary metabolites;ko00940//Phenylpropanoid biosynthesis;ko00500//Starch and sucrose metabolism;ko00460//Cyanoamino acid metabolism	K01188;K01188;K01188;K01188;K01188	-	GO:0004553//hydrolase activity, hydrolyzing O-glycosyl compounds	GO:0005975//carbohydrate metabolic process
HF40884	25.4967	5.82667	-2.12957	1.82006e-36	2.18577e-34	PREDICTED: beta-glucosidase BoGH3B-like [Malus domestica]	Metabolism;Metabolism;Metabolism;Metabolism;Metabolism	Global and overview maps;Global and overview maps;Biosynthesis of other secondary metabolites;Carbohydrate metabolism;Metabolism of other amino acids	ko01100//Metabolic pathways;ko01110//Biosynthesis of secondary metabolites;ko00940//Phenylpropanoid biosynthesis;ko00500//Starch and sucrose metabolism;ko00460//Cyanoamino acid metabolism	K05349;K05349;K05349;K05349;K05349	-	GO:0004553//hydrolase activity, hydrolyzing O-glycosyl compounds	GO:0005975//carbohydrate metabolic process
HF03749	75.1267	4.64667	-4.01506	2.92983e-36	3.45409e-34	PREDICTED: beta-glucosidase 18-like isoform X1 [Malus domestica]	Metabolism;Metabolism;Metabolism;Metabolism;Metabolism	Global and overview maps;Global and overview maps;Biosynthesis of other secondary metabolites;Carbohydrate metabolism;Metabolism of other amino acids	ko01100//Metabolic pathways;ko01110//Biosynthesis of secondary metabolites;ko00940//Phenylpropanoid biosynthesis;ko00500//Starch and sucrose metabolism;ko00460//Cyanoamino acid metabolism	K05350;K05350;K05350;K05350;K05350	-	GO:0004553//hydrolase activity, hydrolyzing O-glycosyl compounds	GO:0005975//carbohydrate metabolic process
HF43762	5.06667	50.7567	3.32449	4.54981e-27	3.0444e-25	PREDICTED: beta-glucosidase 12-like [Pyrus x bretschneideri]	Metabolism;Metabolism;Metabolism;Metabolism;Metabolism	Global and overview maps;Global and overview maps;Biosynthesis of other secondary metabolites;Carbohydrate metabolism;Metabolism of other amino acids	ko01100//Metabolic pathways;ko01110//Biosynthesis of secondary metabolites;ko00940//Phenylpropanoid biosynthesis;ko00500//Starch and sucrose metabolism;ko00460//Cyanoamino acid metabolism	K01188;K01188;K01188;K01188;K01188	-	GO:0004553//hydrolase activity, hydrolyzing O-glycosyl compounds	GO:0005975//carbohydrate metabolic process
HF05787	38.7333	4.11667	-3.23403	2.1015e-16	5.14347e-15	PREDICTED: beta-glucosidase BoGH3B-like [Malus domestica]	Metabolism;Metabolism;Metabolism;Metabolism;Metabolism	Global and overview maps;Global and overview maps;Biosynthesis of other secondary metabolites;Carbohydrate metabolism;Metabolism of other amino acids	ko01100//Metabolic pathways;ko01110//Biosynthesis of secondary metabolites;ko00940//Phenylpropanoid biosynthesis;ko00500//Starch and sucrose metabolism;ko00460//Cyanoamino acid metabolism	K05349;K05349;K05349;K05349;K05349	-	GO:0004553//hydrolase activity, hydrolyzing O-glycosyl compounds	GO:0005975//carbohydrate metabolic process
HF06570	20.1467	7.64	-1.3989	1.33407e-13	2.273e-12	PREDICTED: beta-glucosidase BoGH3B-like isoform X1 [Malus domestica]	Metabolism;Metabolism;Metabolism;Metabolism;Metabolism	Global and overview maps;Global and overview maps;Biosynthesis of other secondary metabolites;Carbohydrate metabolism;Metabolism of other amino acids	ko01100//Metabolic pathways;ko01110//Biosynthesis of secondary metabolites;ko00940//Phenylpropanoid biosynthesis;ko00500//Starch and sucrose metabolism;ko00460//Cyanoamino acid metabolism	K05349;K05349;K05349;K05349;K05349	-	GO:0004553//hydrolase activity, hydrolyzing O-glycosyl compounds	GO:0005975//carbohydrate metabolic process
HF14233	7.22	2.24	-1.6885	4.19219e-11	5.20883e-10	PREDICTED: beta-glucosidase BoGH3B [Malus domestica]	Metabolism;Metabolism;Metabolism;Metabolism;Metabolism	Global and overview maps;Global and overview maps;Biosynthesis of other secondary metabolites;Carbohydrate metabolism;Metabolism of other amino acids	ko01100//Metabolic pathways;ko01110//Biosynthesis of secondary metabolites;ko00940//Phenylpropanoid biosynthesis;ko00500//Starch and sucrose metabolism;ko00460//Cyanoamino acid metabolism	K05349;K05349;K05349;K05349;K05349	-	GO:0004553//hydrolase activity, hydrolyzing O-glycosyl compounds	GO:0005975//carbohydrate metabolic process
HF19862	0.97	2.11333	1.12346	1.52778e-06	9.14143e-06	PREDICTED: beta-glucosidase BoGH3B-like isoform X2 [Ziziphus jujuba]	Metabolism;Metabolism;Metabolism;Metabolism;Metabolism	Global and overview maps;Global and overview maps;Biosynthesis of other secondary metabolites;Carbohydrate metabolism;Metabolism of other amino acids	ko01100//Metabolic pathways;ko01110//Biosynthesis of secondary metabolites;ko00940//Phenylpropanoid biosynthesis;ko00500//Starch and sucrose metabolism;ko00460//Cyanoamino acid metabolism	K05349;K05349;K05349;K05349;K05349	-	GO:0004553//hydrolase activity, hydrolyzing O-glycosyl compounds	GO:0005975//carbohydrate metabolic process
MSTRG.4580	0.001	2.35333	11.2005	2.66418e-06	1.52737e-05	PREDICTED: beta-glucosidase 13-like [Malus domestica]	Metabolism;Metabolism;Metabolism;Metabolism;Metabolism	Global and overview maps;Global and overview maps;Biosynthesis of other secondary metabolites;Carbohydrate metabolism;Metabolism of other amino acids	ko01100//Metabolic pathways;ko01110//Biosynthesis of secondary metabolites;ko00940//Phenylpropanoid biosynthesis;ko00500//Starch and sucrose metabolism;ko00460//Cyanoamino acid metabolism	K01188;K01188;K01188;K01188;K01188	-	-	-
HF06072	27.2	55.01	1.01609	9.66367e-06	5.01007e-05	PREDICTED: beta-glucosidase 11-like isoform X1 [Pyrus x bretschneideri]	Metabolism;Metabolism;Metabolism;Metabolism;Metabolism	Global and overview maps;Global and overview maps;Biosynthesis of other secondary metabolites;Carbohydrate metabolism;Metabolism of other amino acids	ko01100//Metabolic pathways;ko01110//Biosynthesis of secondary metabolites;ko00940//Phenylpropanoid biosynthesis;ko00500//Starch and sucrose metabolism;ko00460//Cyanoamino acid metabolism	K01188;K01188;K01188;K01188;K01188	-	GO:0004553//hydrolase activity, hydrolyzing O-glycosyl compounds	GO:0005975//carbohydrate metabolic process
HF14164	0.176667	1.12	2.6644	0.00123625	0.0039737	PREDICTED: beta-glucosidase 13-like [Pyrus x bretschneideri]	Metabolism;Metabolism;Metabolism;Metabolism;Metabolism	Global and overview maps;Global and overview maps;Biosynthesis of other secondary metabolites;Carbohydrate metabolism;Metabolism of other amino acids	ko01100//Metabolic pathways;ko01110//Biosynthesis of secondary metabolites;ko00940//Phenylpropanoid biosynthesis;ko00500//Starch and sucrose metabolism;ko00460//Cyanoamino acid metabolism	K01188;K01188;K01188;K01188;K01188	-	GO:0004553//hydrolase activity, hydrolyzing O-glycosyl compounds	GO:0005975//carbohydrate metabolic process
MSTRG.3761	0.001	1.90667	10.8968	0.00150697	0.0047444	PREDICTED: beta-glucosidase BoGH3B-like [Malus domestica]	Metabolism;Metabolism;Metabolism;Metabolism;Metabolism	Global and overview maps;Global and overview maps;Biosynthesis of other secondary metabolites;Carbohydrate metabolism;Metabolism of other amino acids	ko01100//Metabolic pathways;ko01110//Biosynthesis of secondary metabolites;ko00940//Phenylpropanoid biosynthesis;ko00500//Starch and sucrose metabolism;ko00460//Cyanoamino acid metabolism	K05349;K05349;K05349;K05349;K05349	-	-	-
